# Supplementary material for: HiPS-Endothelial Cells Acquire Cardiac Endothelial Phenotype in Co-culture With hiPS-Cardiomyocytes
Source: Front Cell Dev Biol. 2021 Aug 6;9:715093. doi: 10.3389/fcell.2021.715093 (PMC8378235; doi:10.3389/fcell.2021.715093)
Supplement: Supplementary file 2 [file Table_1.XLSX]

## Sheet: TableS1 (2)
Coculture ECs vs Monoculture ECs		Coculture CMs vs Monoculture CMs
Upregulated	Downregulated	Upregulated	Downregulated		Supplemental Table 1: Genes that had a significantly different expression in coculture vs. monoculture. Genes with FDR>0.01 and log fold change >0.1 for upregulated and <-0.1 for downregulated genes are highlighted in bold.
ID1	PGF	GNG11	FTH1
HIST1H4C	C10orf10	S100A10	FTL
PLVAP	FAM89A	HES4	TCAP
MYL7	CHST1	DGKI	TUBA1B
CYBA	PHLDA1	A2M	LINC01405
SPP1	TP53I11	C4orf48	HSPB3
HPGD	SERPINB4	ACTB	PGAM2
PRCP	TAGLN	S100A11	LRRC10
HAPLN1	SOD2	PLVAP	PPDPF
ITM2B	SSR3	VASH1	EGR1
ACTC1	LXN	MASP1	ETFB
ANKRD1	MYL9	SH3BGRL3	CCDC34
VAMP5	CD24	HSPG2	HSPB1
ID3	SEPW1	BAMBI	UQCRB
RDX	EFCAB14	TMEM141	SLC8A1
GSTO1	LINC01480	EGFL7	SLC25A5
LBH	GPX3	TM4SF1	NREP
A2M	KRT18	TMSB4X	NDUFB8
SOX4	CBLN1	TMSB10	COL21A1
FLT1	SLC12A2	SLC38A2	NPM1
FCGRT	FASN	ID3	FITM1
MDK	RPS2	ESM1	ZFP36L1
FABP4	SCD	DSP	ATP5G2
TNNC1	MVD	GFOD1	LGALS3
ENG	SH3BP5	SPARC	COX6A2
F2R	RPSA	SPOCK1	TPM1
NRP2	NETO2	VCAN	NDUFA13
TMEM88	FAM43A	PRSS23	UNC5B-AS1
CA2	ICAM2	ATP1A1	HIPK2
FCN3	FN1	H2AFZ	FXYD6
HMGB2	RPLP0	CCDC85B	RP11-532N4,2
HTRA1	EIF2B2	EPHB3	FGF18
NDUFB1	ADA	TGM2	MYOZ2
TNNT2	MLLT11	USP18	SAP18
TFPI2	TPM2	CD59	NDUFA1
TPM1	KLF6	LIMS1	RPL26
MT-ND3	CREB3L1	MMP15	RPL36A
NDUFA3	GALNT1	JAG1	TCEA3
UBE2C	SMAD1	NES	NDUFB4
CALCRL	FADS2	FLT1	ECH1
HES4	RPS3	PTMA	CFL2
TYMS	SLC38A1	PHLDA1	MLIP
TNNI1	MT-ND1	HES1	AC090498,1
HMGB1	HOXB6	P4HB	RPS10
ESAM	ABCA9-AS1	MFGE8	PSMB6
MT2A	APLN	IFITM2	EIF3E
BMP4	PXDN	RAMP2	TUBA1A
COL15A1	FADS3	MARCKSL1	TP53I3
MYL4	CREM	ETV5	PRDX2
ATP5E	TNFSF10	ID1	SRP14
CLEC14A	NEAT1	RBM38	RPL17
MEF2C	ACKR3	THBS1	HSPB7
TUBB2A	SERPINB3	BMP2	BLVRB
HMGN2	CAV1	SERPINH1	MT1E
TMEM258	RPL8	IVNS1ABP	LDHB
GSN	MT-ATP6	ITGB5	RBX1
IGFBP4	RNF19A	APLN	ZNF106
PDLIM1	RPS5	RASL11B	C14orf2
ADGRL4	CLDN5	PACS1	AP1S2
RAMP2	FAM213A	CAPN2	MDH1
LDB2	MT-CYB	SDC3	UBE2E2
NPPA	CXCR4	CGNL1	MDH2
ESM1	RPL12	PLXNA2	ATP5I
SEC62	MPG	ROR1	ATPIF1
MGST3	MT-ND4	SEC61A1	EIF1
PLPP3	RPL3	LAPTM4B	ATP5O
IL6ST	RPL10	KCTD10	PSMA2
THY1	EEF1D	CALU	COX7B
UBL5	ATF4	KCTD17	MRPL15
RPS29	TM7SF2	TSPAN18	PRKAA2
C12orf57	OGFRL1	PXDN	C7orf55
FAM107B	EEF1B2	MT-CO2	RPL10
COTL1	MPC1	VAMP5	SMIM19
ATP5I	PCBD1	SHC1	PFDN5
EFNB2	TXNRD2	S100A6	NDUFC1
EFEMP1	MT-ND2	ATP13A3	STOML2
CD9	C14orf1	P3H2	SNHG18
APLNR	HOMER3	ARPC1B	COX5B
SNRPG	ACAT2	TMEM30A	ATP5B
POLR2L	FAM26D	PLOD1	NDUFV1
TFPI	FADS1	CD9	UQCR11
KIAA0101	ITPKB	TMEM185A	AK1
PTMA	RPS3A	SORT1	HMGN3
COX7C	ADM	CD34	RPL7
ROMO1	RPL26	IGFBP3	RPL10A
SNRPF	TMSB4X	ARHGDIB	COX7C
TMEM204	RPL9	PCDH17	RPL3
SLIRP	SRM	P3H4	ATP5C1
ITGB1	FLNB	TAGLN2	RPS15A
IVNS1ABP	NME4	PLEKHM2	UQCRFS1
S100A16	RPS9	ESAM	NDUFB11
USMG5	CCND2	PECAM1	MORF4L1
IER2	RPL4	RP11-879F14,2	METTL5
CTSC	YIPF1	SPRY4	RPL5
MRPL17	RPS19BP1	NEDD8	DNPH1
ATP1B1	TSTA3	ITGA5	RTN4
LIFR	RPL14	HPGD	YWHAE
ITGA1	RPL13A	CLCN5	MARCH11
COX6C	FSCN1	CYBA	LINC00467
HES1	RPL18A	PLXND1	RPL14
TAGLN2	ANXA6	CD93	NDUFB1
NDUFB4	GFOD1	SPP1	KLHDC2
RPL38	RPL7A	CD276	RPS8
COX5B	EBP	IGFBP2	RPL35A
BSG	VIM	CSRP1	UQCR10
IL32	LGALS1	CLDN5	TIPRL
RRM2	RPL10A	ABRACL	SERPINI1
HYAL2	GTF3A	EFNB2	COX4I1
DEK	PPP1R14B	ADGRL4	JUN
CSRP2	RPL13	ANXA1	PAIP2B
C14orf2	MAP1LC3B	TNFRSF21	RPL21
ID2	TNFAIP8L1	NAT8L	ATP6V1G2
TSPAN7	MT-CO2	EVA1B	FAU
RPS27	MT-CO3	KDR	IFIT1
ATOX1	TSPO	ADGRG6	FAM124A
DUSP5	RP11-322E11.5	FXYD5	AP000769,1
DCHS1	RPL7	ENG	BEST1
TMSB10	HOPX	TFPI2
SHFM1	CDC42EP5	ETV4
KRTCAP2	WFS1	COTL1
IFITM2	APRT	FN1
MIR4435-2HG	PRELID1	F2R
LMO2	PHLDA2	EHD2
NDUFC1	PRND	LYPD6B
WBP5	ADAM19	LIMD2
NDUFA1	CXorf36
CD55	CHCHD2
ATP5J2	FAM69B
MDFI	RGCC
OST4	SOX18
EFEMP2	PRR13
RPS28	LY6H
C4orf48	RPS4X
THBS1	CACNG8
MRPL33	SQLE
MALAT1	EIF4EBP1
PALMD	RPL19
UQCRQ	DOCK9
DUT	BASP1
KTN1	NES
TMA7	S100A10
MTUS1	ANXA3
WWTR1	IER3
COX17	ACLY
RAB31	SH3BGRL3
FABP5	MGST1
HSBP1	RPL22L1
SNRPE	AMD1
SDCBP	PKIG
CCDC3	RPL29
TIMP3	S100A6
IFITM3	SERP1
DUSP4	MAP1A
RPS27L	JUND
H1FX	FDFT1
NFKBIA	SLC25A1
PET100	HRAS
PLN	ALDH2
CAPG	TACC1
CNN3	LSS
CKS1B	EDN1
PBX1	PCDH12
RGS10	SORBS2
CENPW	YBX1
COMMD6	SNHG25
TCEB2	USP31
SELE	MGMT
CENPF	RNASE1
NDUFB3	INSIG1
HIPK2	PPDPF
NPR3	CYB5R1
H2AFZ	ZFAND2A
RNF145	SCN3B
PIN4	DBI
MKI67	ALDOA
GRN	PGD
ADAMTS9	OSBPL10
UQCRB	ADAMTS7
IGFBP7	STK25
TSC22D1	MGLL
CTNNB1	HOXB5
LPAR6	MTDH
UQCR10	RPL5
TOMM7	OLFML3
FSTL1	RPL6
FAM101B	RPL18
NAA38	PRDM1
HEY2	HMGCS1
TTN	PPA1
APP	RGS20
KDR	RPS10
NDUFA2	FMNL3
TIMM8B	MTHFD2
RPL37A	LRRFIP1
MAGED2	NACA
C11orf96	GPM6B
SPATS2L	MXD4
TSPAN13	TUBA1B
NDUFA12	PCBP4
RPL37	MCAM
UQCR11	TCF4
SEC61G	PRDX5
MYEOV2	PKIB
RPS26	PDLIM2
NOP10	DEF8
COL6A2	N4BP3
SERPINH1	GAPDH
TIMP1	MYO1B
PTTG1	NFIA-AS2
C11orf31	YBX3
LIPG	TMEM178A
MINOS1	RASSF2
HSPG2	ARL6IP4
ELK3	SSH2
TM4SF18	MSMO1
MMRN1	LINC00176
CSRP3	TSPAN15
SRPX	CLTB
TUBB2B	ITGB1BP1
CDH13	WSCD1
PVRL2	RPS6
MYL12B	CEACAM21
COX6B1	MTSS1
UQCC2	GNG2
NASP	EPOR
COL11A1	TRIM16
EVA1B	SOX11
GMNN	HSPB1
SERF2	SHC1
LSM7	GPRIN3
MARCKSL1	C20orf24
NDUFB2	LPIN1
TK1	HOXD1
SMIM4	MAVS
HEXB	GUK1
BST1	MRPS15
B2M	STRA13
TNFRSF12A	LAMA4
SNRPB2	BOK
TAC1	GNB2L1
SNRPD1	FAM126A
LEPROT	OAZ1
ZFP36L1	SEMA6B
AC090498.1	BIN1
RBP1	HES6
MYL12A	ITM2C
SLC2A3	UBE2M
HLA-E	SDF2L1
MSMP	PSMA2
CTSB	RNF167
MFGE8	MT-CO1
VAMP8	DESI1
RPL35A	CLPP
ANXA5	TMEM97
TUBB6	RAC3
TGFB1	INTS3
COX7B	TXN2
SMC4	ARHGEF7
CTSA	TUBA4A
PCNA	EPS8L1
MYH7	PCYT2
PAPSS1	HMOX1
PDGFA	ILDR2
TSPAN18	WASF2
ATP1A1	CRELD2
SYMPK	SNRPN
H3F3A	NUDT4
TOP2A	EIF1
FXYD6	JTB
BIRC5	STK32C
MAGOH	RPS6KA2
CKS2	CALM1
RNF181	PTPRF
EXOC3L2	FAAP20
GIMAP7	WARS
CDC42EP1	CCND1
TMEM109	SHISA4
RPL34	AK1
PHF19	MYH10
DPM3	C19orf24
ATP11C	AP3S1
ARGLU1	HSPD1
SNRK	GTF3C6
AGRN	HCFC1R1
COX8A	METRN
TPX2	AURKAIP1
ATP1B3	IDS
CD151	LASP1
SEPT11	MZT2B
RHOBTB3	TAF9
RPA3	ANGPT2
CD59	MAP2K1
SLC7A11	TMEM120A
MYL3	ARHGEF28
EMC10	RPS7
SON	TXNL4A
CDK1	MLF1
CNIH4	DTNBP1
DDX18	EEF2
OCIAD2	RTN4
CDH5	ARHGEF15
DDX5	HLX
LYL1	ME1
BCAP29	PYCARD
CLSPN	BGN
NUCKS1	BTF3
ATP5J	SMS
TMEM173	CDC42EP3
PLXND1	PRDX6
RPL39	CHST15
LINC00116	CISD3
RBPMS	TKT
BACE2	DAAM1
HACD3	TMEM189
GNG11	CAMLG
GIMAP8	SNCG
LSM8	CXADR
CKLF	UBTD1
COX7A2	MEIS2
TOMM5	LSM10
SRRM1	BCAT1
NQO1	CDK17
S100A13	TPT1
CALM2	YWHAG
SEPT7	GARS
VGLL4	WSB1
COX6A1	SLC25A6
LAPTM4A	MYL6B
ZSCAN16-AS1	COL5A1
HDAC1	EIF3E
DHFR	MMAB
NUDC	PYM1
GJA5	P4HB
ROBO1	KLF3
ANO6	MPST
SNRPB	SULF2
GINS2	ANAPC15
PEA15	GRPEL2
HSPB7	ICAM3
DEGS1	UNC13B
PAM	MESDC1
ARL6IP1	MYH9
C8orf4	PGP
DYNC1I2	C11orf73
ATP5L	ORAI3
SGK1	CITED4
ADGRF5	UBE2F
TMEM106C	BABAM1
DAB2	LYRM1
TPR	VASH1
CDC20	HYOU1
CCDC68	ST3GAL5
RANBP1	MXRA7
LYSMD2	DCXR
LINC00493	APOPT1
SAP18	CASP10
KCNN2	RPS18
ABI3	GCSH
RBX1	AIDA
CRYAB	RHBDF1
BCAM	PSMD13
H3F3B	RABAC1
DTYMK	RPL15
LSM6	PABPC1
AP1S2	INO80C
NDUFB7	EIF4E2
TMEM261	MYC
ACTA2	ACSM3
MAP1LC3A	MARVELD1
SLC25A4	CPEB2
JUNB	CHCHD10
NGFRAP1	GAS2L3
NDUFB6	UBALD2
KLHL4	MRPL15
NRP1	GSTP1
CST3	DEDD2
TMPO	IDH1
NT5E	ESYT1
HMGB3	YKT6
PARP1	VAT1
EGFL7	PHACTR1
AKIP1	RBM3
CMTM3	NME3
CBX1	OLA1
HNRNPA3	NT5DC2
PCDH17	DPH3
CRIM1	SPHK1
C7orf73	C22orf29
TSPAN4	AFAP1L1
TMEM50A	UCP2
CD99	CDC42EP2
CSTB	MT-ND5
PDIA3	STUB1
PLIN2	IGF2
AURKB	POLDIP2
ENY2	PLXNA2
CTC-526N19.1	MARCH4
BOLA3	LDHA
DNAJC9	ZDHHC9
SKA2	RRAS
TUBB4B	BCL2L11
PRC1	LDLR
SLC3A2	ERGIC1
ITGA2	DRC1
AAMDC	C7orf50
RB1	SMTN
CYYR1	ADD3
GIMAP4	ATP5D
DNMT1	KIF1C
NDUFAF4	PABPC4
TXNDC17	THBD
UBE2T	AHCY
SULT1C4	JOSD2
STAB1	HSPA1A
SRSF7	SSNA1
TRAF4	CORO1C
NDUFS6	TRAPPC1
PLEKHA1	BZW1
SMC2	ISG15
PFDN2	SEC61A1
MZT2A	NT5C3B
EIF3J	COMT
ADGRA2	NENF
CDKN3	FDPS
EIF4A2	FRMD4A
COX14	PALD1
LIPA	RPL11
MDH1	FREM1
CLEC2B	PBXIP1
LAMP1	RAC2
SNCA	EHD1
LUZP1	MAP2K2
MMRN2	MYZAP
TXNDC12	DHCR24
HELLS	VKORC1L1
GTF2H5	RPLP1
TMEM100	TNK2
RPL23	HIF1A
NDUFA13	IMPDH2
NCL	OSTC
TEAD2	EBF3
EMCN	ITGA9
SCARB2	ARPC3
MRPL52	MAPKAPK2
LSM3	RALA
RRAGA	YDJC
MNAT1	NUDT8
TMOD2	RHOJ
RCN2	TMEM219
MCM5	FAM124B
EIF5A	HDLBP
USP1	AGAP1
RAB2A	PRKAR2A
IKBIP	BTG1
SLC45A4	FNDC3B
SRP9	ADGRL3
GTSE1	MSRB1
SNRPD2	MICA
RBMS1	APOA1BP
SRI	EMILIN2
ASAH1	CDC42BPA
MRPS6	RPS27A
NBL1	CTDSPL
H2AFV	MPC2
HSPE1	SND1
ITGB5	GPI
CFAP20	SEMA6A
ERH	SCN9A
TPPP3	RP11-386G11.10
RPL36	RRP36
CLIC1	TIMM17A
SMC3	PABPN1
HNRNPA2B1	EMD
GPX7	CANX
CRIP2	COX20
SREK1IP1	PRSS23
C8orf59	CDKN2A
HECW2	NUDT16
SKIL	CDV3
LSM5	TMEM167A
FKBP2	GLRX
PSAP	PREX1
RNASEH2A	FAM174B
ISYNA1	MAFF
RPL22	MAP2K3
MYBL2	HDDC2
MBNL1	AP3D1
MRPS18C	MEX3B
REPIN1	TMEM183A
HNRNPA0	DOK4
SNTB1	CCT3
SPRY1	SNF8
TMEM37	CELF1
TGFBR3	AKT1S1
GDF15	CPT1C
PNRC1	RNF157
CMSS1	INHBB
TIMM10	SNHG8
EMC7	EIF4G2
PTPRB	PCSK7
JAG1	SHMT2
ATP5B	POLR3H
ZWINT	DNAJC2
NDUFA6	SH3BP2
ATPIF1	ECE1
NUSAP1	FLNA
POLR2F	WDR26
PLK1	SSU72
BAMBI	LYPLA1
CCNB1	YWHAZ
ITGA8	INO80E
HP1BP3	SLC25A3
SIVA1	ARCN1
CTNNAL1	SEPT9
GNG5	RPL23A
FZD4	PFN1
PIEZO2	VSTM1
NDUFA4	GLTSCR2
CAMTA1	MAP4
EIF5B	ST6GALNAC4
ACAA2	VDAC2
INSR	APOC1
SLC44A1	VEPH1
TLN1	RPS11
PDIA6	WASF1
KPNA2	CCDC88C
SEC14L1	RNF144A
SUPT16H	IMP3
ANXA11	POPDC3
OAZ2	SLC9A1
MCM7	HIGD2A
PHPT1	RAB15
TIE1	IRF3
C19orf70	RPS24
FLT4	MIIP
PDLIM5	ZSWIM7
DYNLL1	RPS4Y1
PTPRG	STARD9
RPS21	NHP2
ACADM	EIF3G
FBLN1	F2RL3
TDG	MRPS12
GPX8	GRK5
PYURF	VWF
RPL35	KIF1A
CISD1	SLC2A6
EFNA1	CD34
CDCA4	TMEM259
SIPA1	MORF4L2
SGCB	BCL7C
GNG12	DHCR7
CHCHD7	RP1-16A9.1
PRKDC	XPO6
LMO4	UBA6
RPL27A	KDELR2
EHD3	TRAF3IP2
PTPRE	SCO2
SH3BGRL	MICALL2
PEPD	SLC2A4RG
CKAP2	GLIPR2
IER3IP1	SPTAN1
POLR2K	DHX32
PRRC2C	RPL17
HNRNPD	DDA1
GRB10	NEFL
CD63	TGFBRAP1
HNRNPR	PIM3
CCDC109B	EIF3F
HNRNPAB	C16orf13
CBX5	GFM1
SCP2	RORA
FLOT1	TAF1
SLC9A3R2	RP11-660L16.2
SPC25	STXBP1
ARL2	PHF10
YTHDC1	G6PD
RAB5C	IQCA1
MT-ND4L	RAB3D
MYO6	MAP3K7CL
CITED2	KDELR3
NSRP1	BCYRN1
HNRNPDL	SLC27A5
AHR	MGAT2
CD81	YIF1A
TSG101	KCNK6
RHOB	LTBP2
POMP	ANKRD9
U2SURP	SPRED2
ARPC5L	GAS1
RGS5	EFHC1
EMP2	SULT1A1
CCNA2	CGNL1
GCC2	SLC46A3
SSBP4	THSD1
SUB1	GPC6
AURKA	ZNHIT1
TCEB1	IDI1
ATP6AP2	GPC4
SSB	PIK3CG
ENC1	RAB13
SEPP1	SLC7A1
CPE	RP11-20D14.6
LAMTOR5	B3GALT6
GNS	GNAI2
PGK1	PPP2R3A
MYH6	IQSEC3
TMCO1	COX4I1
LIMD2	SIN3B
CD40	CYB561
ARL6IP6	TMCC1
RELB	TEX9
ILK	C2CD4B
HIST1H1C	HSD17B12
FDX1	NAA10
CCDC34	PTP4A2
RPIA	LRRC59
REST	ARHGDIA
PTTG1IP	CDYL
IFI16	AKAP13
CDK4	PYCR1
VPS28	ACE
MALL	STEAP1B
AKR1B1	CCDC189
LOXL2	FAM118A
FOXC1	KALRN
SMAD6	MRFAP1
PRPF6	GCHFR
H2AFJ	FAM26E
LINC00152	ACOX1
SMURF2	DOK3
ANP32A	ATF3
HLA-DRB1	NPC2
CENPM	SIRPA
FJX1	RPS13
LIMCH1	KIT
PTOV1	SOCS2
COPRS	CBWD1
TMEM123	SNX10
FDXR	PWP1
CNPY3	LINC01420
GNG7	ODC1
ACTN1	NEIL1
RTF1	SLC39A14
TM4SF1	CALD1
CXCL1	THEMIS2
PLK2	GADD45GIP1
F2RL2	HN1
RAB7A	CMTM2
THRAP3	GNB1
RPL30	RP5-940J5.9
C11orf58	DENND2A
MMD	FNDC5
EPB41L2	RHBDF2
ASPM	PLCB3
YWHAH	FAM84A
NDUFA8	TXN
ESF1	MYO5C
BRI3	NDUFB8
METAP2	EIF3H
TPP1	PLXNA3
BMPR2	SERINC2
SF3B4	LPCAT3
MRPL57	ABCG1
HNRNPF	VIM-AS1
MCM3	TMEM44
LRRC4	TIMM13
CKB	TBX1
SLC25A37	COL27A1
POLR3K	SRP14
PCTP	FAH
ORC6	TUBE1
FILIP1	EPHX4
TM9SF2	PNPLA3
UPP1	FBXL19
EXOC3L1	ADM5
ERBB2IP	MME
WLS	ADGRE5
DNAJC8	DLL3
SERBP1	WNT5A
SYNE2	SREBF1
POLR2I	BCHE
PBK	MFSD3
PLEKHO1	GPR1
HDAC2	KCNA5
TGM2	MAPK13
TMEM165	DOCK8
ARMCX3	MMP25-AS1
AMOTL2	TRPV2
TEK	ST3GAL4-AS1
ATP6V1G1	GPR162
SPCS2	SLC46A1
ATAD2	RP11-356I2.4
NOTCH1	MARK1
BEX4	ZBTB7B
DDX24	TMEM135
GSDMD	RP11-392P7.6
RRM1	ANK2
CNBP	RP11-192H23.6
TUBB	PPARGC1B
PGLS	SLC29A2
LRRC32	RP11-1398P2.1
ASNA1	EEF1A1
PA2G4	TIPARP
KHDRBS1	UBC
CTSD	RPL36A
CTNNA1	CYR61
PRKCDBP	HSP90AA1
HNRNPK
SNX2
PPP1CA
CENPU
STX3
ARHGDIB
RPS15A
TEAD4
CPPED1
KIF22
RHOC
PFN2
RPA2
TSC22D3
TAX1BP3
TJP1
SOX17
C22orf39
RBBP7
RALB
CYP1A1
ILVBL
NTHL1
HK1
SSBP2
RPL31
CYSLTR1
CMTM8
GNAI1
PSMG4
CENPK
EID1
CDT1
MPDZ
SORT1
MRPS21
RNASEH2C
H1F0
SUMF2
NECAP2
RBM8A
TRA2B
PKN2
LPL
TAF11
COMMD2
SMARCB1
GLOD4
APEX1
SFPQ
FEZ2
RPL39L
ETS2
AP1S1
SNU13
UBE2D1
NDUFA11
FBN2
GIMAP1
RAB11A
IRF2BP2
ATP2B1
GIMAP6
LAMA5
CPXM1
TFAM
AIMP1
MFAP2
CDC42SE1
FEN1
SCML1
IL3RA
PON2
HNRNPU
SNRPC
MMP14
MTCH1
HSP90B1
PPIC
SIGIRR
KRT8
UPF2
KIAA1147
CTSL
STMN1
SBDS
AKR7A2
RHOA
XRCC5
FAM171B
DLGAP5
UBXN4
UPF3A
RAP1A
FXYD5
PRMT1
SLFN5
ARF1
TMBIM6
HMMR
ITGA5
SASH1
MAP1S
SYNPO
NDUFA5
SRSF2
COL18A1
PPT1
OCIAD1
KLHL5
PUF60
IL13RA1
CEBPZ
SEP15
CHURC1
EIF4A3
SLBP
ATP5H
ZYX
ALDH7A1
TRIM47
IQGAP2
CENPE
DDX46
TMEM14C
LAGE3
RPL27
ARF5
WBP4
REEP3
FOXP1
MESDC2
GPAA1
ITGAV
MORF4L1
RHEB
DNAJA1
ARRDC3
FGFR1
EDIL3
MYOZ2
FOXM1
SMPX
WBP11
ZNF608
MRPL13
RPAIN
CACYBP
DYNLT1
ST5
NREP
CAPZA2
NUCB1
CMTM6
SPTBN1
PMP22
C4orf27
ITGA10
PPM1G
UHRF1
SAE1
CCDC74A
PTRHD1
SRSF3
ERCC1
LRPAP1
PCDH7
CYB5D2
MYL2
ZFYVE21
MSN
ATP6AP1
SQSTM1
SLC1A4
PRKAR1A
FRZB
SMC1A
E2F4
RGL2
CCDC59
MRPS36
FAM210B
KCTD15
SERPINB9
UXT
KCNMB4
FERMT2
SRD5A3
C7orf55
BLOC1S1
SDHD
CEP55
RAD51C
TCF19
RABEP1
MAP7D3
DLC1
GLB1
E2F1
ZFHX3
ANLN
CHAF1A
MYCBP2
CFDP1
DHRS3
CDC37
VEGFC
TCEAL4
TNNI3
PKP4
CPNE2
AKAP12
HAUS1
ALDH9A1
RENBP
IDH2
MYCT1
RAD51AP1
MTRNR2L8
YIPF3
ROCK2
QPCT
FNBP1
MAFB
RTFDC1
FNTA
WDR34
TMEM59
LMAN2
CARHSP1
CPM
SETBP1
INPP1
POLR2J
BRD7
GOLIM4
DAD1
TSPAN3
DDX1
BTBD3
EEA1
NHSL2
CYC1
SNRNP25
HAT1
BTG3
IARS2
RRBP1
UBE2E1
LMNB1
CASP6
NOSTRIN
HEXA
NID2
ANAPC11
MAD2L1
SLC40A1
NDUFS5
ZNF503
PMEPA1
FAM64A
CALR
PCBP2
PFKL
RARG
CYFIP1
MED4
SGOL2
VIMP
PLTP
ATP6V1B2
LIMS1
GRINA
SPINT2
NR2F1-AS1
MZT1
IK
GALE
STK17A
BEX1
GGCX
DAP
IMMP1L
COPS8
NFIB
SSRP1
TUBG1
SCARF1
YAF2
TGFBR2
CCNB2
DST
PLAUR
SMARCA5
MARCKS
COMMD7
CMC1
RUNX1T1
OSTM1
TBX3
PKM
UBE2J1
RAD21
FAR2
HLA-A
TRIM8
ARPC5
YEATS4
HIST2H2AC
SLC35G2
MGAT1
BIRC2
PRPF31
SERPINB6
HAPLN3
NOC4L
SMOX
MND1
RALY
IFNGR1
SCAF11
CHCHD1
BET1
C4orf3
DDB2
CHID1
VANGL1
CENPA
RCN3
SNRNP70
FHL1
CDC27
SNRPD3
PPP2R1A
LAMB1
YIF1B
NR2F1
SLC39A3
FKBP5
CD46
C1orf56
NDUFS4
MITD1
RCC2
ARMCX2
NDUFB5
UTRN
PSMC2
SGOL1
MXRA5
HMGA2
RPA1
PLSCR1
ZNF706
LAMTOR4
SEPT2
CCDC14
GABARAPL2
PSMD10
TAPBP
FAM60A
DHRS7B
HEBP1
ELOVL5
ANAPC16
RAB11B
PSMD7
TMEM9B
PCM1
CHD4
SRSF4
RFC2
KLF7
MSX1
NFKBIE
FAM89B
ZNF22
DLL4
ADGRG1
CYB5R3
PALM
EBPL
PSME1
PTPN12
IL4R
TRAPPC4
AK2
GPN3
BANF1
COPS7A
MAD2L2
ASF1B
RAC1
HMGN1
DYNC1LI1
C1QTNF6
FAU
AKAP9
SMARCE1
RBM17
PPIL1
MGST2
IRF2BPL
PFDN1
ANKRD12
CADM4
GUSB
EBNA1BP2
ADRM1
NR2F2
KIF20B
SLC48A1
DPY30
PPP4C
GLMP
NAA20
PSMC3
JMJD1C
SH2B3
SUMO1
MCFD2
MAGOHB
CDCA3
GAR1
CAV2
PCGF5
SERTAD1
SYCE1L
PCGF2
RAP2B
RAB38
MARCH3
DSN1
MEF2A
FGD5-AS1
ZNF428
HPCAL1
CIRBP
ALDH16A1
TTC1
CNRIP1
A1BG
NDN
SH3KBP1
CKAP2L
UBE2I
SDHA
CLDND1
PSMG2
NDUFV2
XRCC6
TCEA1
GINM1
ASF1A
C1D
SMAD3
COMMD4
ITGA3
TMEM30A
WDR83OS
SNAP23
NOL4L
CHRAC1
MTPN
FKBP9
SNX5
PXMP2
SNRPA
SRSF10
TFDP1
ESD
TWISTNB
SEMA4C
SLC39A10
TLE4
RECQL
ME2
FAM96B
C14orf132
CSNK1A1
SCOC
CHCHD5
FUNDC2
STAG2
SNRNP40
MRPL22
SPPL2A
FAHD2A
MCMBP
UBE2N
NUMB
RPLP2
MIDN
QKI
CASKIN2
EZH2
ZFP36
CCPG1
YPEL2
MRPL2
PCBP1
SEC13
MTF2
OTUB1
TGS1
SNX6
SYF2
RPL41
ISCU
PTPRA
SF3B1
PPP5C
FLNC
CD47
NR5A2
ITPRIPL2
ANXA1
WDR61
NKX2-5
MED28
ETV6
NAE1
BAZ1A
PRR11
LRRC36
KCNC4
TACC3
SPRED1
HS3ST1
RIN2
CDCA8
NDUFS7
DHX30
UBA52
H2AFX
RNF130
MARK4
PAIP1
KIFC1
TNIP1
EEF1E1
TANC1
RMI2
AP3M2
LTBP1
ATP2B4
ARMCX6
STOM
NOSIP
MSH6
MCM4
RPP25
TRIP10
SLCO3A1
ARHGAP5
ILF2
KLHL23
LBR
CD164
PSMB1
PMF1
PBDC1
TRMT112
ZCCHC9
RBM42
CECR5
MRPL41
BCAR1
NDRG2
TMX1
ERP44
CDCA7
PRDX1
PRDX3
AMOTL1
FKBP1A
DECR1
FHL3
PLD3
C9orf142
CADM1
ARHGEF17
RBM39
LAP3
COMMD8
ENO3
LYVE1
TIMM23
MACF1
TMED1
PAPSS2
RRP15
SLC38A10
ASMTL
HIP1
BCAS2
NCOA4
SLC44A2
CA8
COLEC12
RAD51
BOD1
FRG1
ADAMTS12
DUSP3
RPP30
WWC3
GGCT
TBC1D8
SLC25A24
BAZ1B
RABGAP1
RPS25
ASXL1
RAB1B
NMT2
GOSR2
APIP
TAX1BP1
GSTT2B
LAMP2
NSMCE2
C21orf59
TRIP13
PYCR2
TMEM255B
UGP2
XPC
COX16
RAB8A
SHE
OPTN
ZCCHC10
CLPTM1
NUF2
BRIX1
SLIT2
PDGFD
CDCA5
ELFN1
EXOC5
PPP1R11
LGMN
LYPLA2
EZR
ZFYVE16
MEIS1
TXNIP
TROAP
MFNG
PROS1
TANC2
TOPORS-AS1
TGFB1I1
ANXA2
CKAP5
DYRK4
DCTN6
ACTN2
PSME2
RNPS1
DDX39A
TMED4
CDC6
ALPK3
CMPK1
ATP6V0D1
UQCRC1
PAFAH1B3
NCAPG
NCAPH2
ARID5B
ANO10
NUDT15
ABLIM1
MRPS18A
DUSP23
CTDSP1
LIG1
PTGES3
BDH2
NAGK
NUP37
KIF23
UBE2A
RP11-294J22.6
LPP
NRGN
TMEM39B
CDK6
TRIM2
GGH
REEP5
IFNGR2
LMNB2
VEZF1
AAK1
SAMD14
TMEM230
PIGT
SMC6
KIFAP3
TP53
PLOD3
WDR18
EXOSC7
NDC80
COL5A2
NFE2L1
SEPT10
VPS4B
TSPAN6
KIAA1551
TRAPPC6A
MIF
B4GALT1
ABT1
PIP4K2A
TBXAS1
RTCB
NFE2L2
PSMD1
HMGCL
NRROS
C5orf24
PRKCH
SPDL1
HRASLS
HM13
NDUFC2
ZNF532
TEX30
MECOM
MTX2
ANAPC10
IFI27L1
RP5-894A10.2
LST1
UBA2
CDC123
MOB1A
HTATSF1
SFRP1
RTN3
S100A3
ICAM1
FKBP3
CTCF
CTSZ
KIF2A
STAU1
KLHDC8B
MED30
PPP1R14A
RBM22
MICU1
BRE
FAM32A
CENPH
DISC1
GSTK1
DSP
POLE3
CNTNAP2
FAM45A
HPRT1
PNPLA2
SNX3
HMCES
NFYC
SHOC2
SUCLG1
THEM6
SSR2
SKP1
KL
UNC50
ACTL6A
CCDC144NL-AS1
DNAJB6
MCM2
PCMT1
IGFBP2
RFC3
TSPAN11
S100A11
TRIM44
PDHA1
ACTR10
LHFP
HADH
GALNT7
IGF1R
RFC1
EPAS1
WBSCR22
KRAS
WDR76
KNSTRN
MEAF6
CAP1
H2AFY
GULP1
VAPA
FAM63B
MTURN
VPS72
MAP3K13
CCDC58
MRPS23
FURIN
SAR1A
TBCA
ZNF771
ENOPH1
UNC5B-AS1
CREG1
MANBAL
ABL2
SNW1
DIAPH3
GPCPD1
DENND5A
MCM10
DNAJC19
PEF1
COX7A1
IFI27L2
NOP58
TMEM150A
CIB1
MMP16
PPP2R3B
ZNF326
BUB3
TRIOBP
PDE8A
SEMA3G
DAZAP2
LSM14A
TNRC6B
SLC35G1
VRK1
PAIP2
ARL6IP5
COLEC10
TINAGL1
ARHGEF3
SPCS3
CTBP2
CUTC
SMU1
CARD10
LAMTOR2
NEBL
SLC39A1
NSFL1C
EIF2S1
SH2D3C
CRISPLD1
PCDH9
KNOP1
GNAQ
MFAP1
SLC22A17
TMEM35
MYADM
KIF2C
MORN2
NR3C1
JAG2
PPIH
COA5
CRYBG3
FIP1L1
PKMYT1
ZNF521
MED19
NPAS2
IKBKE
BCLAF1
RAD23A
RFC4
HJURP
MRC1
VPS13C
RNF144B
GNPTG
SUMO2
CWF19L2
NAPRT
MXD3
NFKB1
ARF6
RCBTB2
COQ2
CASC5
ANKRD40
CCNF
CTD-3138B18.5
NTPCR
NXT1
C11orf95
DDOST
PHKG1
LRRC8C
KIF4A
PELO
SF3A2
FOXN3
PAK2
EAPP
SYTL4
ZNF638
RNH1
NDUFS3
C1orf123
CBX3
SERPINE2
CERS2
GMPR
USP9X
PITX2
MANSC1
ATAD5
ABHD4
DPM2
UNG
CHMP2B
SPIN4
CELF2
NRBP1
UXS1
EWSR1
RFXANK
SNX1
UBE2B
TCF25
METTL9
PRKCSH
UBTF
RNF166
TRIB1
CNP
SUCLG2
MYLIP
ZEB1
GALC
LMBRD1
CDK5RAP2
FZD6
PDCD4
POLD3
MAT2B
HLTF
ABHD17A
SYNJ2
PPIL4
TSR2
CCDC28B
LINC01405
BRCA2
SPAG9
ARHGAP24
PDLIM3
ANKRD49
KIF9
PSMC3IP
MCM6
PALLD
VSIG10
CLN5
SDHC
BRD8
NSMCE4A
REEP4
CD58
ABI2
HIBADH
SNUPN
GDI2
ABCF1
SHCBP1
RBBP4
PANK2
SUPT4H1
SAFB
SDHB
BRCA1
ARID4B
EXOSC9
FBXO5
SYAP1
TMCC3
BPHL
MELK
WDR45B
CHMP3
TSEN54
VCL
EVA1A
SLC12A5
MSH2
TRIB2
EIF4E
TPRKB
C15orf39
C2orf76
NCSTN
CBFB
HTRA2
ATP8B1
PFDN4
RPS15
COA6
SAV1
PLA2G16
ETFA
PTPRN2
RAB21
ZNRD1
ATXN7L3B
ASCC3
PRPF4B
ARHGAP11A
GNL1
TBC1D15
CETN3
TOP1
SHROOM4
COPE
ZNHIT3
FAM111A
FAM104B
VPS51
PARD3
DUSP6
GMPS
HIGD1A
MVB12A
C9orf3
COMMD1
LARP7
RAB14
DNTTIP1
TRIM28
CLEC1B
SIAH1
IDH3B
XRN2
CYP20A1
FAM127C
SEZ6L2
FARSA
IFRD2
LINC01483
ATPAF1
BCL10
GAP43
STIM2
DCK
PGRMC2
BBC3
CDC5L
POLR2H
YWHAB
CPNE5
AIP
LINC01235
LRWD1
MCPH1
MIS18A
TELO2
RNF5
TRIP11
TPI1
WDR43
HMG20B
MPPED2
PRPF8
MPV17
NRG1
C1orf52
ABHD2
NOTCH4
NIPSNAP3A
ELF2
ZBTB8OS
CBY1
EXT2
P3H2
DPM1
FH
PDCL3
ATXN10
PLIN3
CSTF2T
PRPF19
FTH1
MPHOSPH6
MIS18BP1
HOXB4
PNKD
KLF11
ATP6V1E1
CASP8AP2
RGS14
SRRT
PSMD12
DNAJB11
TRAPPC12
SYPL1
PCNX
C20orf196
NAPA
ANTXR2
CEP170
ELK4
FOXK1
EIF2B1
CHMP4B
TGIF2
BEX2
RYBP
ZMIZ1
DNPH1
ARL13B
FNIP2
VBP1
YAP1
C6orf203
CDC45
ERLEC1
RNF2
URM1
CHD6
FCHO2
PDS5B
AIFM1
PARVA
TCF7L2
FAM3C
DNAJC15
STAG1
GTF2F2
MKKS
DOK5
SLC25A11
CCDC130
TMTC4
ABHD12
TSEN15
G2E3
PLA2G4C
SUN1
CRELD1
POC1A
FZD1
NT5C3A
WHSC1L1
CCDC47
WDR70
ABRACL
EXT1
SMYD3
TSFM
MCRS1
CHMP2A
PEAR1
UROS
HEG1
ATP6V0B
MRC2
KCNN3
RNF152
TIMM17B
PGRMC1
GNA14
FBN1
LACTB
DDX50
STARD10
POLR2J2
SPC24
CCNH
DRAM1
ELP6
RMDN3
FNDC3A
FAM234A
PPIF
TMX2
VOPP1
TCN2
NR2C2AP
PLCL1
PJA2
PRTG
ZMAT3
CSE1L
NIPBL
MTHFD1
GLRX5
MLEC
STAT3
CCDC115
LARP6
KIF13A
TIMM44
TRMT10C
SPATA33
IWS1
PRDX4
GBAS
CTDSPL2
ZNF704
RAE1
CRBN
COIL
LPIN2
ARSA
MRPL46
NDUFB11
RACGAP1
AC013461.1
RANGAP1
CIR1
MEX3D
FOSL1
LRRC41
CHKA
ARMC1
RBM14
ASAP2
IAH1
ADSS
DSCC1
FRMD4B
RSRC2
TOPBP1
CIAPIN1
ABLIM3
SDCBP2
UBAC2
LRIG3
ZNF467
KBTBD2
RNF213
SCAMP3
CDK5RAP3
TUSC1
NIP7
C11orf54
AKT3
PACSIN2
PNO1
FAM110A
RBCK1
DHX9
NUDT9
SNAPC1
MYLK
THUMPD1
PSMA3
LEO1
C1orf112
CDK11A
FANCD2
GPATCH11
PPID
ITGB3BP
PERP
SLC25A13
HMGN3
PRKAR1B
ABTB2
OSMR
ZMYND11
MMP9
SELK
NSL1
SKA3
SRPRA
GSS
BRINP1
RP11-295G20.2
SKIDA1
SAMM50
FN3KRP
SPG20
TMEM222
[truncated: 1,100 more rows]
